# Supplementary material
Source: ML conference proceedings conference paper supplement (https://proceedings.neurips.cc/paper_files/paper/2007/hash/9f396fe44e7c05c16873b05ec425cbad-Abstract.html)
Supplement: Supplementary file [file 9f396fe44e7c05c16873b05ec425cbad-Supplemental.zip]

# Poster M9: *Optimistic Linear Programming gives Logarithmic Regret for Irreducible MDPs*

Ambuj Tewari & Peter L. Bartlett

## Learner in an unknown MDP

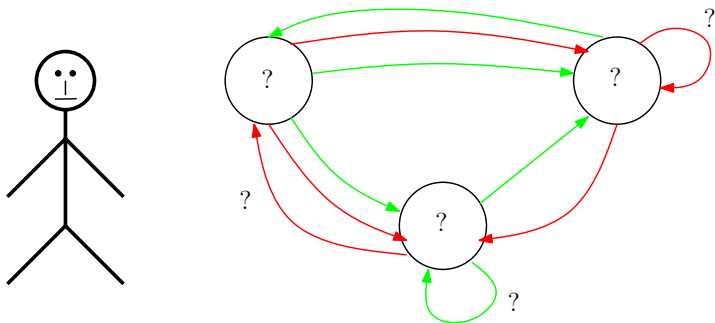

## Competitor knows the MDP

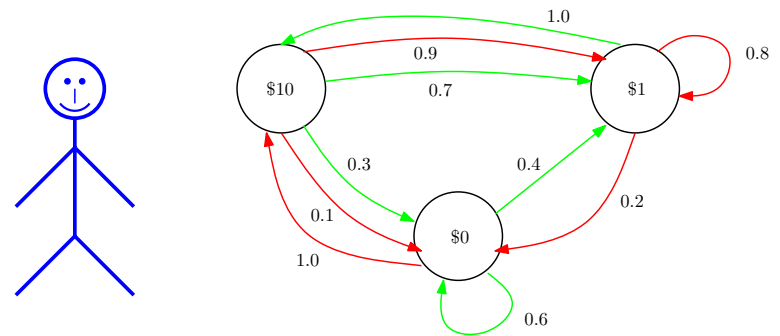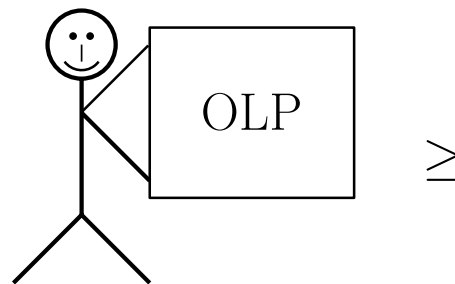

$\geq$

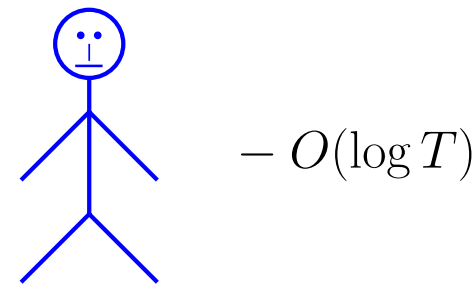

- OLP is based on Burnetas-Katehakis algorithm
- Is computationally more efficient
- Similar in flavor to Auer-Ortner algorithm (NIPS 2006)

- Doesn't have to know support sets of transition distributions
- Has a simpler analysis
- Has better ( $S$  vs.  $S^5$ ) state space size dependence compared to AO
