# Supplementary material
Source: ML conference proceedings conference paper supplement (https://proceedings.neurips.cc/paper_files/paper/2007/hash/9f396fe44e7c05c16873b05ec425cbad-Abstract.html)
Supplement: Supplementary file [file 9f396fe44e7c05c16873b05ec425cbad-Supplemental.zip]

---

# Optimistic Linear Programming gives Logarithmic Regret for Irreducible MDPs

---

Anonymous Author(s)

Affiliation

Address

email

## Appendix

*Proof of Proposition 2.* Fix  $(i, a) \in \text{Crit}(P)$ . Drop dependence of  $\phi^*$ ,  $K$ ,  $\text{MakeOpt}$ ,  $H^*$  on  $i, a, P$  for readability. Also, let  $J(\epsilon) = J_{i,a}(p_i(a); P, \epsilon)$ . Since  $|\text{Crit}(P)| \leq |S||A|$ , it suffices to show that  $\phi^*/K \leq (H^*)^2/\phi^*$ . Let  $\epsilon < \phi^*$  be arbitrary. By definition of  $\text{MakeOpt}(\epsilon)$  and  $\phi^*$ , we have, for all  $q \in \text{MakeOpt}(\epsilon)$ ,  $\langle q, h^* \rangle - \langle p_i(a), h^* \rangle \geq \phi^* - \epsilon$ . This implies  $\|p_i(a) - q\|_1 \geq (\phi^* - \epsilon)/H^*$  since  $H^* = \|h^*\|_\infty$ . Thus, by definition of  $J(\epsilon)$ , we have

$$J(\epsilon) \geq \frac{(\phi^* - \epsilon)^2}{(H^*)^2} \quad \Rightarrow \quad \lim_{\epsilon \rightarrow 0} J(\epsilon) \geq \frac{(\phi^*)^2}{(H^*)^2}.$$

By definition, the left hand side is  $K$ . Thus,  $\phi^*/K \leq (H^*)^2/\phi^*$ . □

*Proof of Proposition 3.* Fix  $\mu \in \mathcal{O}(P, \mathcal{A})$ . Drop the dependence of  $h^*$ ,  $H^*$ ,  $\lambda^*$ ,  $T_\mu$  on  $P$ . It suffices to prove that  $H^* \leq T_\mu$  for the result then follows from Proposition 2 and definition of  $T(P)$ . Since rewards and hence the gain  $\lambda^*$  are in  $[0, 1]$ , and  $\lambda^*$ ,  $h^*$  satisfy, for all  $i \in S$ ,

$$\lambda^* + h^*(i) = r(i, \mu(i)) + \langle p_i(\mu(i)), h^* \rangle, \quad (1)$$

we have, for all  $i \in S$ ,

$$\langle p_i(\mu(i)), h^* \rangle \geq h^*(i) - 1. \quad (2)$$

Start the policy  $\mu$  in state  $j$  and define the random variables  $Y_t := h(s_t)$ . Clearly  $Y_0 = h(j)$ . Fix a state  $i \neq j$ . Define the stopping time

$$\tau := \min\{t > 0 : s_t = i\}.$$

Because of (2), we have

$$\mathbb{E}_j^{\mu, P}[Y_{t+1} | Y_t] \geq Y_t - 1.$$

Adding  $t+1$  to both sides we see that  $Y_t + t$  is a submartingale and hence using the optional stopping theorem (see, for example, [1, p. 489]), we have

$$\mathbb{E}_j^{\mu, P}[Y_\tau + \tau] \geq Y_0.$$

By definition of  $T_\mu$ , we have

$$\mathbb{E}_j^{\mu, P}[\tau] \leq T_\mu.$$

Thus, noting that  $Y_\tau = h^*(i)$  and  $Y_0 = h^*(j)$ , we have

$$h^*(i) + T_\mu \geq h^*(j).$$

But this is true for all  $i \neq j$ . Also, there is some  $i^* \in S$  such that  $h^*(i^*) = 0$ . Therefore,  $H^* = \|h^*\|_\infty \leq T_\mu$ . □

## References

[1] Grimmett, G.R. & Stirzaker, D.R. (2001) *Probability and Random Processes*. Oxford: Oxford University Press, third edition.
